# Supplementary material
Source: PubMed Central journal article supplement (PMC4980543)
Supplement: mmc1.pdf [file mmc1.pdf]

# Nonlinear Imputation of $\text{PaO}_2/\text{FIO}_2$ From $\text{SpO}_2/\text{FIO}_2$ Among Patients With Acute Respiratory Distress Syndrome

*Samuel M. Brown, MD; Colin K. Grissom, MD; Marc Moss, MD; Todd W. Rice, MD;  
David Schoenfeld, PhD; Peter C. Hou, MD; B. Taylor Thompson, MD; and Roy G. Brower, MD;  
with the NIH/NHLBI PETAL Network Collaborators*

CHEST 2016; 150(2):307-313

*Online supplements are not copyedited prior to posting and the author(s) take full responsibility for the accuracy of all data.*

© 2016 AMERICAN COLLEGE OF CHEST PHYSICIANS. Reproduction of this article is prohibited without written permission from the American College of Chest Physicians. See online for more details. DOI: 10.1016/j.chest.2016.01.003

**eTable 1. Equations used to impute PaO<sub>2</sub> from SpO<sub>2</sub>**

| Equation                                                                                                                                                                                                                                                 | Method      | Populations                                                      |
|----------------------------------------------------------------------------------------------------------------------------------------------------------------------------------------------------------------------------------------------------------|-------------|------------------------------------------------------------------|
| $PO_2 = \left\{ \frac{11,700}{(1/S - 1)} + \left[ 50^3 + \left( \frac{11,700}{1/S - 1} \right)^2 \right]^{1/2} \right\}^{1/3}$ $+ \left\{ \frac{11,700}{(1/S - 1)} - \left[ 50^3 + \left( \frac{11,700}{1/S - 1} \right)^2 \right]^{1/2} \right\}^{1/3}$ | Non-linear* | Physiology laboratory(1); ED patients with pneumonia(2)          |
| $PO_2 = F \cdot \left( \frac{S - 64}{0.84} \right)$                                                                                                                                                                                                      | Linear      | Patients with ARDS(3)                                            |
| $PO_2 = F \cdot 10^{\left( 0.48 + 0.78 \cdot \log_{10} \left( \frac{S}{F} \right) \right)}$                                                                                                                                                              | Log-linear  | Patients undergoing general anesthesia(4); patients with ARDS(4) |

\*The equation is used to estimate PaO<sub>2</sub> from SaO<sub>2</sub>. We did not formally model the relationship between SpO<sub>2</sub> and SaO<sub>2</sub>.

**eTable 2: Imputed PF ratio (cells) for combinations of SpO<sub>2</sub> (rows) and FiO<sub>2</sub> (columns)**

|     | 0.30 | 0.35 | 0.40 | 0.45 | 0.50 | 0.55 | 0.60 | 0.65 | 0.70 | 0.75 | 0.80 | 0.85 | 0.90 | 0.95 | 1.00 |
|-----|------|------|------|------|------|------|------|------|------|------|------|------|------|------|------|
| 80% | 148  | 127  | 111  | 98   | 89   | 81   | 74   | 68   | 63   | 59   | 55   | 52   | 49   | 47   | 44   |
| 81% | 151  | 129  | 113  | 101  | 91   | 82   | 76   | 70   | 65   | 60   | 57   | 53   | 50   | 48   | 45   |
| 82% | 155  | 132  | 116  | 103  | 93   | 84   | 77   | 71   | 66   | 62   | 58   | 55   | 52   | 49   | 46   |
| 83% | 158  | 136  | 119  | 106  | 95   | 86   | 79   | 73   | 68   | 63   | 59   | 56   | 53   | 50   | 47   |
| 84% | 162  | 139  | 122  | 108  | 97   | 89   | 81   | 75   | 70   | 65   | 61   | 57   | 54   | 51   | 49   |
| 85% | 167  | 143  | 125  | 111  | 100  | 91   | 83   | 77   | 71   | 67   | 63   | 59   | 56   | 53   | 50   |
| 86% | 171  | 147  | 129  | 114  | 103  | 94   | 86   | 79   | 73   | 69   | 64   | 61   | 57   | 54   | 51   |
| 87% | 177  | 151  | 132  | 118  | 106  | 96   | 88   | 81   | 76   | 71   | 66   | 62   | 59   | 56   | 53   |
| 88% | 182  | 156  | 137  | 121  | 109  | 99   | 91   | 84   | 78   | 73   | 68   | 64   | 61   | 58   | 55   |
| 89% | 189  | 162  | 141  | 126  | 113  | 103  | 94   | 87   | 81   | 75   | 71   | 67   | 63   | 60   | 57   |
| 90% | 196  | 168  | 147  | 130  | 117  | 107  | 98   | 90   | 84   | 78   | 73   | 69   | 65   | 62   | 59   |
| 91% | 203  | 174  | 153  | 136  | 122  | 111  | 102  | 94   | 87   | 81   | 76   | 72   | 68   | 64   | 61   |
| 92% | 213  | 182  | 159  | 142  | 128  | 116  | 106  | 98   | 91   | 85   | 80   | 75   | 71   | 67   | 64   |
| 93% | 223  | 191  | 168  | 149  | 134  | 122  | 112  | 103  | 96   | 89   | 84   | 79   | 74   | 71   | 67   |
| 94% | 236  | 202  | 177  | 157  | 142  | 129  | 118  | 109  | 101  | 94   | 89   | 83   | 79   | 75   | 71   |
| 95% | 252  | 216  | 189  | 168  | 151  | 138  | 126  | 116  | 108  | 101  | 95   | 89   | 84   | 80   | 76   |
| 96% | 273  | 234  | 205  | 182  | 164  | 149  | 136  | 126  | 117  | 109  | 102  | 96   | 91   | 86   | 82   |

**eTable 3: Simplified lookup table for specific PF thresholds**

| <b>FIO<sub>2</sub></b> | <b>For PF ≤ 100,<br/>qualifying SpO<sub>2</sub> must<br/>be less than</b> | <b>For PF ≤ 150,<br/>qualifying SpO<sub>2</sub> must<br/>be less than</b> | <b>For PF ≤ 200,<br/>qualifying SpO<sub>2</sub><br/>must be less than</b> | <b>For PF ≤ 300,<br/>qualifying SpO<sub>2</sub> must<br/>be less than</b> |
|------------------------|---------------------------------------------------------------------------|---------------------------------------------------------------------------|---------------------------------------------------------------------------|---------------------------------------------------------------------------|
| 0.30                   | ineligible                                                                | 81%                                                                       | 91%                                                                       | 97%                                                                       |
| 0.35                   | ineligible                                                                | 87%                                                                       | 94%                                                                       | 97%                                                                       |
| 0.40                   | ineligible                                                                | 91%                                                                       | 96%                                                                       | 97%                                                                       |
| 0.45                   | 81%                                                                       | 94%                                                                       | 97%                                                                       | 97%                                                                       |
| 0.50                   | 86%                                                                       | 95%                                                                       | 97%                                                                       | 97%                                                                       |
| 0.55                   | 89%                                                                       | 97%                                                                       | 97%                                                                       | 97%                                                                       |
| 0.60                   | 91%                                                                       | 97%                                                                       | 97%                                                                       | 97%                                                                       |
| 0.65                   | 93%                                                                       | 97%                                                                       | 97%                                                                       | 97%                                                                       |
| 0.70                   | 94%                                                                       | 97%                                                                       | 97%                                                                       | 97%                                                                       |
| 0.75                   | 95%                                                                       | 97%                                                                       | 97%                                                                       | 97%                                                                       |
| 0.80                   | 96%                                                                       | 97%                                                                       | 97%                                                                       | 97%                                                                       |
| 0.85                   | 97%                                                                       | 97%                                                                       | 97%                                                                       | 97%                                                                       |
| 0.90                   | 97%                                                                       | 97%                                                                       | 97%                                                                       | 97%                                                                       |
| 0.95                   | 97%                                                                       | 97%                                                                       | 97%                                                                       | 97%                                                                       |
| 1.00                   | 97%                                                                       | 97%                                                                       | 97%                                                                       | 97%                                                                       |
